# Supplementary material
Source: PubMed Central journal article supplement (PMC4186040)
Supplement: hvi-10-1993-s01.pdf [file hvi-10-1993-s01.pdf]

## **Supplemental Material to:**

**Roman Prymula, Susanna Esposito, Gian Vincenzo Zuccotti, Fang Xie, Daniela Toneatto, Igor Kohl, Peter M Dull**

**A phase 2 randomised controlled trial of a multicomponent meningococcal serogroup B vaccine (I): Effects of prophylactic paracetamol on immunogenicity and reactogenicity of routine infant vaccines and 4CMenB**

**Human Vaccines & Immunotherapeutics 2014; 10(7)  
<http://dx.doi.org/10.4161/hv.28666>**

**[www.landesbioscience.com/journals/vaccines/article/28666](http://www.landesbioscience.com/journals/vaccines/article/28666)**

## Supplementary tables – Prymula et al.

**Table 1.** Geometric mean concentrations for pneumococcal vaccine antigens.

**Table 2.** Percentages of subjects achieving recognised cut-offs for routine vaccine component antigens (diphtheria, tetanus, *Haemophilus influenzae* type B, hepatitis B, and inactivated poliovirus).

**Table 3.** Percentages of subjects achieving seroconversion to routine vaccine acellular pertussis antigens (pertussis toxoid, filamentous hemagglutinin, pertactin).

**Table 4.** Percentages of subjects achieving recognised cut-offs for pneumococcal vaccine antigens – 0.35 µg/mL after primary vaccination and 1.0 µg/mL after a booster dose.

| <b>Table 1. Geometric mean ELISA concentrations for pneumococcal vaccine antigens (95% CI)</b> |                           |                                       |                                       |                                       |                                                             |
|------------------------------------------------------------------------------------------------|---------------------------|---------------------------------------|---------------------------------------|---------------------------------------|-------------------------------------------------------------|
| <b>Serotype</b>                                                                                | <b>Timing</b>             | <b>Study groups</b>                   |                                       |                                       | <b>Difference between 4CMenB + Para and 4CMenB (95% CI)</b> |
|                                                                                                |                           | <b>4CMenB</b>                         | <b>4CMenB + Para</b>                  | <b>Men C</b>                          |                                                             |
| <b>04</b>                                                                                      | Post-3 <sup>rd</sup> dose | <b>1.62</b><br>(1.37–1.91)<br>N = 140 | <b>1.44</b><br>(1.22–1.7)<br>N = 135  | <b>1.78</b><br>(1.49–2.12)<br>N = 132 | 0.89<br>(0.7–1.12)                                          |
|                                                                                                | Pre-booster               | <b>0.63</b><br>(0.54–0.74)<br>N = 124 | <b>0.67</b><br>(0.57–0.79)<br>N = 120 | <b>0.81</b><br>(0.7–0.94)<br>N = 135  | 1.06<br>(0.85–1.33)                                         |
|                                                                                                | Post-booster              | <b>11</b><br>(9.37–13)<br>N = 120     | <b>10</b><br>(8.42–12)<br>N = 121     | <b>13</b><br>(11–15)<br>N = 124       | 0.9<br>(0.7–1.16)                                           |
| <b>6B</b>                                                                                      | Post-3 <sup>rd</sup> dose | <b>1.1</b><br>(0.86–1.39)<br>N = 140  | <b>0.88</b><br>(0.69–1.11)<br>N = 135 | <b>1.21</b><br>(1.49–2.12)<br>N = 132 | 0.8<br>(0.57–1.12)                                          |
|                                                                                                | Pre-booster               | <b>0.84</b><br>(0.69–1.02)<br>N = 124 | <b>0.75</b><br>(0.62–0.91)<br>N = 120 | <b>0.88</b><br>(0.72–1.07)<br>N = 135 | 1.06<br>(0.85–1.33)                                         |
|                                                                                                | Post-booster              | <b>20</b><br>(16–25)<br>N = 120       | <b>17</b><br>(13–21)<br>N = 121       | <b>21</b><br>(17–27)<br>N = 124       | 0.9<br>(0.7–1.16)                                           |
| <b>9V</b>                                                                                      | Post-3 <sup>rd</sup> dose | <b>3.21</b><br>(2.81–3.65)<br>N = 140 | <b>2.95</b><br>(2.58–3.37)<br>N = 135 | <b>3.13</b><br>(2.66–3.68)<br>N = 132 | 0.92<br>(0.76–1.11)                                         |
|                                                                                                | Pre-booster               | <b>0.9</b><br>(0.78–1.04)<br>N = 124  | <b>0.95</b><br>(0.82–1.09)<br>N = 120 | <b>1.03</b><br>(0.9–1.18)<br>N = 135  | 1.05<br>(0.85–1.28)                                         |
|                                                                                                | Post-booster              | <b>12</b><br>(10–14)<br>N = 120       | <b>11</b><br>(9.46–13)<br>N = 121     | <b>13</b><br>(11–16)<br>N = 124       | 0.93<br>(0.74–1.16)                                         |
| <b>14</b>                                                                                      | Post-3 <sup>rd</sup> dose | <b>3.84</b><br>(3.22–4.58)<br>N = 140 | <b>3.04</b><br>(2.54–3.63)<br>N = 135 | <b>3.98</b><br>(3.31–4.77)<br>N = 132 | 0.79<br>(0.62–1.02)                                         |
|                                                                                                | Pre-booster               | <b>2.26</b><br>(1.85–2.77)<br>N = 124 | <b>1.78</b><br>(1.45–2.19)<br>N = 120 | <b>2.45</b><br>(2.03–2.96)<br>N = 135 | 0.79<br>(0.59–1.05)                                         |
|                                                                                                | Post-booster              | <b>15</b><br>(12–18)<br>N = 120       | <b>13</b><br>(10–15)<br>N = 121       | <b>18</b><br>(15–21)<br>N = 124       | 0.85<br>(0.65–1.11)                                         |
| <b>18c</b>                                                                                     | Post-3 <sup>rd</sup> dose | <b>4.13</b><br>(3.49–4.9)<br>N = 140  | <b>3.34</b><br>(2.81–3.98)<br>N = 135 | <b>4.14</b><br>(3.51–4.89)<br>N = 132 | 0.81<br>(0.63–1.03)                                         |
|                                                                                                | Pre-booster               | <b>0.84</b><br>(0.73–0.97)<br>N = 124 | <b>0.84</b><br>(0.73–0.98)<br>N = 120 | <b>0.88</b><br>(0.78–1)<br>N = 135    | 1<br>(0.82–1.24)                                            |
|                                                                                                | Post-booster              | <b>12</b><br>(9.99–15)<br>N = 120     | <b>10</b><br>(8.46–12)<br>N = 121     | <b>14</b><br>(12–17)<br>N = 124       | 0.85<br>(0.65–1.1)                                          |

|            |                           |                                       |                                       |                                       |                     |
|------------|---------------------------|---------------------------------------|---------------------------------------|---------------------------------------|---------------------|
| <b>19F</b> | Post-3 <sup>rd</sup> dose | <b>4.84</b><br>(4.26–5.51)<br>N = 140 | <b>4.37</b><br>(3.84–4.98)<br>N = 135 | <b>4.62</b><br>(3.91–5.45)<br>N = 132 | 0.9<br>(0.75–1.08)  |
|            | Pre-booster               | <b>0.68</b><br>(0.58–0.8)<br>N = 124  | <b>0.74</b><br>(0.62–0.87)<br>N = 120 | <b>0.88</b><br>(0.73–1.06)<br>N = 135 | 1.08<br>(0.85–1.37) |
|            | Post-booster              | <b>12</b><br>(10–15)<br>N = 120       | <b>9.4</b><br>(7.73–11)<br>N = 121    | <b>12</b><br>(10–14)<br>N = 124       | 0.76<br>(0.58–1.01) |
| <b>23F</b> | Post-3 <sup>rd</sup> dose | <b>2.49</b><br>(2.03–3.04)<br>N = 140 | <b>2.03</b><br>(1.66–2.5)<br>N = 135  | <b>2.39</b><br>(1.94–2.94)<br>N = 132 | 0.82<br>(0.61–1.09) |
|            | Pre-booster               | <b>0.67</b><br>(0.54–0.82)<br>N = 124 | <b>0.73</b><br>(0.59–0.91)<br>N = 120 | <b>0.74</b><br>(0.62–0.88)<br>N = 135 | 1.1<br>(0.81–1.49)  |
|            | Post-booster              | <b>17</b><br>(14–22)<br>N = 120       | <b>15</b><br>(12–19)<br>N = 121       | <b>21</b><br>(17–27)<br>N = 124       | 0.85<br>(0.61–1.18) |

**Table 2.** Percentages of subjects achieving recognised cut-offs for routine vaccine components

| Antigen<br>(cut-off)                                      | Timing                    | Study groups                      |                                   |                                   | Difference between<br>4CMenB+Para and<br>4CMenB (95% CI) |
|-----------------------------------------------------------|---------------------------|-----------------------------------|-----------------------------------|-----------------------------------|----------------------------------------------------------|
|                                                           |                           | 4CMenB                            | 4CMenB +<br>Para                  | Men C                             |                                                          |
| <b>Diphtheria</b><br>(% ≥ 0.1 IU/mL)                      | Post-3 <sup>rd</sup> dose | <b>100</b><br>(97–100)<br>N = 140 | <b>100</b><br>(97–100)<br>N = 135 | <b>100</b><br>(97–100)<br>N = 132 | 0%<br>(-2.7–2.6)                                         |
|                                                           | Pre-booster               | <b>99</b><br>(95–100)<br>N = 119  | <b>97</b><br>(91–99)<br>N = 115   | <b>98</b><br>(95–100)<br>N = 131  | -3%<br>(-7.8–1.4)                                        |
|                                                           | Post-booster              | <b>100</b><br>(97–100)<br>N = 118 | <b>100</b><br>(97–100)<br>N = 120 | <b>100</b><br>(97–100)<br>N = 119 | 0%<br>(-3.1–3.1)                                         |
| <b>Tetanus</b><br>(% ≥ 0.1 IU/mL)                         | Post-3 <sup>rd</sup> dose | <b>100</b><br>(97–100)<br>N = 140 | <b>100</b><br>(97–100)<br>N = 135 | <b>100</b><br>(97–100)<br>N = 132 | 0%<br>(-2.7–2.6)                                         |
|                                                           | Pre-booster               | <b>97</b><br>(93–99)<br>N = 119   | <b>96</b><br>(90–99)<br>N = 115   | <b>97</b><br>(92–99)<br>N = 131   | -2%<br>(-7.5–3.3)                                        |
|                                                           | Post-booster              | <b>100</b><br>(97–100)<br>N = 118 | <b>100</b><br>(97–100)<br>N = 120 | <b>100</b><br>(97–100)<br>N = 119 | 0%<br>(-3.1–3.1)                                         |
| <b>PRP</b><br>(% ≥ 0.15 µg/mL)                            | Post-3 <sup>rd</sup> dose | <b>98</b><br>(94–100)<br>N = 140  | <b>99</b><br>(96–100)<br>N = 135  | <b>100</b><br>(97–100)<br>N = 132 | 1%<br>(-2.1–5.4)                                         |
|                                                           | Pre-booster               | <b>100</b><br>(97–100)<br>N = 119 | <b>100</b><br>(97–100)<br>N = 115 | <b>100</b><br>(97–100)<br>N = 131 | 0%<br>(-3.2–3.1)                                         |
|                                                           | Post-booster              | <b>100</b><br>(97–100)<br>N = 118 | <b>100</b><br>(97–100)<br>N = 120 | <b>100</b><br>(97–100)<br>N = 119 | 0%<br>(-4.5–4.3)                                         |
| <b>Anti-HBs</b><br>(% ≥ 10 mIU/mL)                        | Post-3 <sup>rd</sup> dose | <b>97</b><br>(89–100)<br>N = 65   | <b>97</b><br>(89–100)<br>N = 66   | <b>98</b><br>(91–100)<br>N = 60   | 0%<br>(-7.7–7.8)                                         |
|                                                           | Pre-booster               | <b>92</b><br>(85–97)<br>N = 102   | <b>91</b><br>(84–96)<br>N = 101   | <b>89</b><br>(81–94)<br>N = 107   | -1%<br>(-9.2–7)                                          |
|                                                           | Post-booster              | <b>100</b><br>(96–100)<br>N = 98  | <b>99</b><br>(94–100)<br>N = 95   | <b>99</b><br>(94–100)<br>N = 94   | -1%<br>(-5.7–2.7)                                        |
| <b>Poliovirus</b><br>(% ≥ 8)<br>Post-3 <sup>rd</sup> dose | Poliovirus 1              | <b>99</b><br>(96–100)<br>N = 123  | <b>97</b><br>(92–99)<br>N = 120   | <b>98</b><br>(94–100)<br>N = 119  | -3%<br>(-7.5–1.4)                                        |
|                                                           | Poliovirus 2              | <b>96</b><br>(91–99)<br>N = 123   | <b>96</b><br>(91–99)<br>N = 120   | <b>97</b><br>(93–99)<br>N = 117   | 0%<br>(-5.8–5.5)                                         |
|                                                           | Poliovirus 3              | <b>100</b><br>(97–100)<br>N = 123 | <b>100</b><br>(97–100)<br>N = 120 | <b>99</b><br>(95–100)<br>N = 117  | -0%<br>(-3.1–3.0)                                        |

| <b>Table 3. Percentages of subjects seroconverting to acellular pertussis antigens</b> |                                  |                                 |                                   |                                                          |
|----------------------------------------------------------------------------------------|----------------------------------|---------------------------------|-----------------------------------|----------------------------------------------------------|
|                                                                                        | <b>Study groups</b>              |                                 |                                   | Difference between<br>4CMenB+Para and<br>4CMenB (95% CI) |
|                                                                                        | <b>4CMenB</b>                    | <b>4CMenB + Para</b>            | <b>Men C</b>                      |                                                          |
| <b>Pertussis Toxoid</b>                                                                |                                  |                                 |                                   |                                                          |
| Post-3 <sup>rd</sup> dose                                                              | <b>98</b><br>(94–100)<br>N = 124 | <b>97</b><br>(9–299)<br>N = 119 | <b>100</b><br>(97–100)<br>N = 115 | -2%<br>(-7–3)                                            |
| Post-booster                                                                           | <b>99</b><br>(95–100)<br>N = 100 | <b>96</b><br>(90–99)<br>N = 96  | <b>100</b><br>(97–100)<br>N = 104 | -3%<br>(-9–2)                                            |
| <b>Filamentous hemagglutinin</b>                                                       |                                  |                                 |                                   |                                                          |
| Post-3 <sup>rd</sup> dose                                                              | <b>97</b><br>(92–99)<br>N = 125  | <b>97</b><br>(93–99)<br>N = 119 | <b>98</b><br>(94–100)<br>N = 115  | 1%<br>(-4–6)                                             |
| Post-booster                                                                           | <b>98</b><br>(93–100)<br>N = 100 | <b>96</b><br>(90–99)<br>N = 96  | <b>96</b><br>(90–99)<br>N = 104   | -2%<br>(-8–3)                                            |
| <b>Pertactin</b>                                                                       |                                  |                                 |                                   |                                                          |
| Post-3 <sup>rd</sup> dose                                                              | <b>97</b><br>(92–99)<br>N = 125  | <b>91</b><br>(84–95)<br>N = 119 | <b>97</b><br>(93–99)<br>N = 115   | -6%<br>(-13–0)                                           |
| Post-booster                                                                           | <b>97</b><br>(91–99)<br>N = 100  | <b>98</b><br>(93–100)<br>N = 96 | <b>98</b><br>(93–100)<br>N = 104  | 1%<br>(-5–7)                                             |

| <b>Table 4.</b> Percentages of subjects achieving 0.35 µg/mL for pneumococcal vaccine antigens after three primary doses, and 1.0 µg/mL after a booster dose |                                               |                                   |                                  |                                   |                                                      |
|--------------------------------------------------------------------------------------------------------------------------------------------------------------|-----------------------------------------------|-----------------------------------|----------------------------------|-----------------------------------|------------------------------------------------------|
| Serotype                                                                                                                                                     | Timing                                        | Study groups                      |                                  |                                   | Difference between 4CMenB + Para and 4CMenB (95% CI) |
|                                                                                                                                                              |                                               | 4CMenB                            | 4CMenB + Para                    | Men C                             |                                                      |
| <b>04</b>                                                                                                                                                    | Post-3 <sup>rd</sup> dose<br>(% ≥ 0.35 µg/mL) | <b>95</b><br>(90–98)<br>N = 140   | <b>91</b><br>(85–95)<br>N = 135  | <b>93</b><br>(87–97)<br>N = 132   | -4%<br>(-10.5–2.2)                                   |
|                                                                                                                                                              | Pre-booster<br>(% ≥ 0.35 µg/mL)               | <b>79</b><br>(71–86)<br>N = 124   | <b>77</b><br>(68–84)<br>N = 120  | <b>87</b><br>(80–92)<br>N = 135   | -2.0%<br>(-12.8–8.0)                                 |
|                                                                                                                                                              | Post-booster<br>(% ≥ 1.0 µg/mL)               | <b>98</b><br>(94–100)<br>N = 120  | <b>97</b><br>(92–99)<br>N = 121  | <b>98</b><br>(94–100)<br>N = 124  | -2.0%<br>(-6.7–2.9)                                  |
| <b>6B</b>                                                                                                                                                    | Post-3 <sup>rd</sup> dose<br>(% ≥ 0.35 µg/mL) | <b>76</b><br>(68–83)<br>N = 140   | <b>73</b><br>(65–81)<br>N = 135  | <b>81</b><br>(73–87)<br>N = 132   | -2.0%<br>(-12.7–7.9)                                 |
|                                                                                                                                                              | Pre-booster<br>(% ≥ 0.35 µg/mL)               | <b>85</b><br>(78–91)<br>N = 124   | <b>81</b><br>(73–87)<br>N = 120  | <b>85</b><br>(78–91)<br>N = 135   | -5.0%<br>(-14.2–4.8)                                 |
|                                                                                                                                                              | Post-booster<br>(% ≥ 1.0 µg/mL)               | <b>98</b><br>(93–99)<br>N = 120   | <b>96</b><br>(91–99)<br>N = 121  | <b>97</b><br>(92–99)<br>N = 124   | -2.0%<br>(-7.1–3.4)                                  |
| <b>9V</b>                                                                                                                                                    | Post-3 <sup>rd</sup> dose<br>(% ≥ 0.35 µg/mL) | <b>100</b><br>(97–100)<br>N = 140 | <b>99</b><br>(96–100)<br>N = 135 | <b>98</b><br>(94–100)<br>N = 132  | -1.0%<br>(-4.0–1.9)                                  |
|                                                                                                                                                              | Pre-booster<br>(% ≥ 0.35 µg/mL)               | <b>91</b><br>(85–95)<br>N = 124   | <b>88</b><br>(80–93)<br>N = 120  | <b>97</b><br>(93–99)<br>N = 135   | -4.0%<br>(-11.8–4.2)                                 |
|                                                                                                                                                              | Post-booster<br>(% ≥ 1.0 µg/mL)               | <b>98</b><br>(94–100)<br>N = 120  | <b>98</b><br>(94–100)<br>N = 121 | <b>98</b><br>(94–100)<br>N = 124  | 0%<br>(-4.3–4.4)                                     |
| <b>14</b>                                                                                                                                                    | Post-3 <sup>rd</sup> dose<br>(% ≥ 0.35 µg/mL) | <b>98</b><br>(94–100)<br>N = 140  | <b>93</b><br>(88–97)<br>N = 135  | <b>98</b><br>(94–100)<br>N = 132  | -5%<br>(-10.3–0.3)                                   |
|                                                                                                                                                              | Pre-booster<br>(% ≥ 0.35 µg/mL)               | <b>94</b><br>(89–98)<br>N = 124   | <b>93</b><br>(86–97)<br>N = 120  | <b>97</b><br>(93–99)<br>N = 135   | -2.0%<br>(-8.7–4.7)                                  |
|                                                                                                                                                              | Post-booster<br>(% ≥ 1.0 µg/mL)               | <b>97</b><br>(92–99)<br>N = 120   | <b>97</b><br>(92–99)<br>N = 121  | <b>98</b><br>(94–100)<br>N = 124  | 0%<br>(-5.2–5.3)                                     |
| <b>18c</b>                                                                                                                                                   | Post-3 <sup>rd</sup> dose<br>(% ≥ 0.35 µg/mL) | <b>99</b><br>(96–100)<br>N = 140  | <b>98</b><br>(94–100)<br>N = 135 | <b>100</b><br>(97–100)<br>N = 132 | -2%<br>(-5.6–1.9)                                    |
|                                                                                                                                                              | Pre-booster<br>(% ≥ 0.35 µg/mL)               | <b>89</b><br>(82–94)<br>N = 124   | <b>88</b><br>(80–93)<br>N = 120  | <b>93</b><br>(87–96)<br>N = 135   | -1.0%<br>(-9.6–7.1)                                  |
|                                                                                                                                                              | Post-booster<br>(% ≥ 1.0 µg/mL)               | <b>98</b><br>(93–99)<br>N = 120   | <b>98</b><br>(93–99)<br>N = 121  | <b>98</b><br>(94–100)<br>N = 124  | 0%<br>(-4.8–4.9)                                     |

|            |                                               |                                  |                                  |                                  |                      |
|------------|-----------------------------------------------|----------------------------------|----------------------------------|----------------------------------|----------------------|
| <b>19F</b> | Post-3 <sup>rd</sup> dose<br>(% ≥ 0.35 µg/mL) | <b>99</b><br>(96–100)<br>N = 140 | <b>99</b><br>(95–100)<br>N = 135 | <b>98</b><br>(94–100)<br>N = 132 | -1.0%<br>(-4.6–2.5)  |
|            | Pre-booster<br>(% ≥ 0.35 µg/mL)               | <b>84</b><br>(76–90)<br>N = 124  | <b>81</b><br>(73–87)<br>N = 120  | <b>88</b><br>(81–93)<br>N = 135  | -3.0%<br>(-12.7–6.6) |
|            | Post-booster<br>(% ≥ 1.0 µg/mL)               | <b>98</b><br>(94–100)<br>N = 120 | <b>93</b><br>(86–97)<br>N = 121  | <b>97</b><br>(92–99)<br>N = 124  | -6.0%<br>(-12.0–0.6) |
| <b>23F</b> | Post-3 <sup>rd</sup> dose<br>(% ≥ 0.35 µg/mL) | <b>95</b><br>(90–98)<br>N = 140  | <b>93</b><br>(87–96)<br>N = 135  | <b>92</b><br>(87–96)<br>N = 132  | -2.0%<br>(-8.7–3.5)  |
|            | Pre-booster<br>(% ≥ 0.35 µg/mL)               | <b>73</b><br>(65–81)<br>N = 124  | <b>73</b><br>(64–80)<br>N = 120  | <b>82</b><br>(75–88)<br>N = 135  | -1.0%<br>(-12–10.2)  |
|            | Post-booster<br>(% ≥ 1.0 µg/mL)               | <b>96</b><br>(91–99)<br>N = 120  | <b>95</b><br>(90–98)<br>N = 121  | <b>97</b><br>(92–99)<br>N = 124  | -1.0%<br>(-6.7–5.0)  |
